# Supplementary material for: Two new tellurite halides with cationic layers: syntheses, structures, and characterizations of CdPb2Te3O8Cl2 and Cd13Pb8Te14O42Cl14
Source: Royal Society of Chemistry journal article supplement (doi:10.1039/d1qi01251g), 2022-01-01
Supplement: d1qi01251g1.pdf [file d1qi01251g1.pdf]

## Electronic Supplementary Information

### Two New Tellurite Halides with Cationic Layers: Syntheses, Structures, and Characterizations of $\text{CdPb}_2\text{Te}_3\text{O}_8\text{Cl}_2$ and $\text{Cd}_{13}\text{Pb}_8\text{Te}_{14}\text{O}_{42}\text{Cl}_{14}$

Chen Bai,<sup>#ab</sup> Yu Chu,<sup>#a</sup> Jiazheng Zhou,<sup>a</sup> Linan Wang,<sup>a</sup> Ling Luo,<sup>a</sup> Shilie Pan<sup>\*a</sup> and Junjie Li<sup>\*a</sup>

<sup>a</sup> CAS Key Laboratory of Functional Materials and Devices for Special Environments, Xinjiang Technical Institute of Physics & Chemistry, CAS; Xinjiang Key Laboratory of Electronic Information Materials and Devices, 40-1 South Beijing Road, Urumqi 830011, China.

<sup>b</sup>College of Chemistry and Chemical Engineering, Xinjiang Normal University, 102 Xinyi Road, Urumqi 830054, China.

# These authors contributed equally to this work.

\*Corresponding authors: [lijunjie@ms.xjb.ac.cn](mailto:lijunjie@ms.xjb.ac.cn), [slpan@ms.xjb.ac.cn](mailto:slpan@ms.xjb.ac.cn).

## Table Captions

**Table S1.** Atomic coordinates ( $\times 10^4$ ) and equivalent isotropic displacement parameters ( $\text{\AA}^2 \times 10^3$ ) for  $\text{CdPb}_2\text{Te}_3\text{O}_8\text{Cl}_2$ .  $U_{\text{eq}}$  is defined as one third of the trace of the orthogonalized  $U_{ij}$  tensor.

**Table S2.** Bond lengths [ $\text{\AA}$ ] and angles [ $^\circ$ ] for  $\text{CdPb}_2\text{Te}_3\text{O}_8\text{Cl}_2$ .

**Table S3.** Atomic coordinates ( $\times 10^4$ ) and equivalent isotropic displacement parameters ( $\text{\AA}^2 \times 10^3$ ) for  $\text{Cd}_{13}\text{Pb}_8\text{Te}_{14}\text{O}_{42}\text{Cl}_{14}$ .  $U_{\text{eq}}$  is defined as one third of the trace of the orthogonalized  $U_{ij}$  tensor.

**Table S4.** Bond lengths [ $\text{\AA}$ ] and angles [ $^\circ$ ] for  $\text{Cd}_{13}\text{Pb}_8\text{Te}_{14}\text{O}_{42}\text{Cl}_{14}$ .

**Table S5.** Selected Mulliken atomic populations.

**Table S6.** Selected bond distances and Mulliken overlap populations for characteristic atomic pairs.

## Figure Captions

**Figure S1.** The EDS spectra of  $\text{CdPb}_2\text{Te}_3\text{O}_8\text{Cl}_2$  (a) and  $\text{Cd}_{13}\text{Pb}_8\text{Te}_{14}\text{O}_{42}\text{Cl}_{14}$  (b).

**Figure S2.** (a-g) Coordination of Cd1-Cd7 atoms in  $\text{Cd}_{13}\text{Pb}_8\text{Te}_{14}\text{O}_{42}\text{Cl}_{14}$ .

**Figure S3.** (a-d) Coordination of Pb1-Pb4 atoms in  $\text{Cd}_{13}\text{Pb}_8\text{Te}_{14}\text{O}_{42}\text{Cl}_{14}$ .

**Figure S4.** (a-g) Coordination of Te1-Te7 atoms in  $\text{Cd}_{13}\text{Pb}_8\text{Te}_{14}\text{O}_{42}\text{Cl}_{14}$ .

**Figure S5.** The Cd coordination environments in  $\text{C}_3\text{H}_9\text{Cd}_{1.5}\text{Cl}_3\text{O}_4\text{P}$ ,  $\text{CdOHCl}$ ,  $\text{Cd}(\text{IO}_3)\text{Cl}$  and  $\text{Cd}_5(\text{BO}_3)_3\text{Cl}$ .

**Figure S6.** The Pb coordination environments in  $\text{Pb}_3\text{O}_2\text{Cl}_2$ ,  $\text{Pb}_{17}\text{O}_8\text{Cl}_{18}$ ,  $\text{Ba}_{27}\text{Pb}_8\text{O}_8\text{Cl}_{54}$  and  $\text{RbPb}_8\text{O}_4\text{Cl}_9$ .

**Figure S7.** XRD patterns of  $\text{CdPb}_2\text{Te}_3\text{O}_8\text{Cl}_2$  (a) and  $\text{Cd}_{13}\text{Pb}_8\text{Te}_{14}\text{O}_{42}\text{Cl}_{14}$  (b) before and after heating at 550 °C ( $\text{CdPb}_2\text{Te}_3\text{O}_8\text{Cl}_2$ ) and 650 °C ( $\text{Cd}_{13}\text{Pb}_8\text{Te}_{14}\text{O}_{42}\text{Cl}_{14}$ ).

**Figure S8.** (a) SHG intensities of  $\text{CdPb}_2\text{Te}_3\text{O}_8\text{Cl}_2$  and  $\text{AgGaS}_2$  as the references at 2.09  $\mu\text{m}$  radiation. (b) Calculated birefringence ( $\Delta n$ ) of  $\text{CdPb}_2\text{Te}_3\text{O}_8\text{Cl}_2$ .

**Figure S9.** SHG intensities of  $\text{CdPb}_2\text{Te}_3\text{O}_8\text{Cl}_2$  and KDP as the references at 1064 nm radiation.

**Figure S10.** The electron density maps of  $\text{Cd}^{2+}$ ,  $\text{Pb}^{2+}$  and  $\text{Te}^{4+}$ .

**Figure S11.** Calculated band structures of  $\text{CdPb}_2\text{Te}_3\text{O}_8\text{Cl}_2$  and  $\text{Cd}_{13}\text{Pb}_8\text{Te}_{14}\text{O}_{42}\text{Cl}_{14}$  under different accuracy.

**Table S1.** Atomic coordinates ( $\times 10^4$ ) and equivalent isotropic displacement parameters ( $\text{\AA}^2 \times 10^3$ ) for  $\text{CdPb}_2\text{Te}_3\text{O}_8\text{Cl}_2$ .  $U_{\text{eq}}$  is defined as one third of the trace of the orthogonalized  $U_{ij}$  tensor.

| <b>Atom</b> | <b>x</b>  | <b>y</b>   | <b>z</b>  | <b>U(eq)</b> | <b>BVS</b> |
|-------------|-----------|------------|-----------|--------------|------------|
| Cd(1)       | -5000     | -5000      | -7679(3)  | 13(1)        | 1.86       |
| Pb(1)       | -3393(1)  | -7480(1)   | -4664(2)  | 15(1)        | 2.27       |
| Te(1)       | -6305(1)  | -8043(2)   | -5051(1)  | 12(1)        | 3.83       |
| Te(2)       | -5000     | -5000      | -3486(2)  | 13(1)        | 3.91       |
| O(1)        | -4347(8)  | -5710(20)  | -5235(17) | 19(4)        | 2.12       |
| O(2)        | -5577(9)  | -7290(20)  | -3530(20) | 20(3)        | 2.08       |
| O(3)        | -5892(11) | -7510(20)  | -7157(19) | 21(4)        | 2.08       |
| O(4)        | -5902(8)  | -10177(19) | -4810(20) | 15(3)        | 2.14       |
| Cl(1)       | -2549(4)  | -4913(8)   | -2346(8)  | 28(1)        | 0.75       |

**Table S2.** Bond lengths [Å] and angles [°] for CdPb<sub>2</sub>Te<sub>3</sub>O<sub>8</sub>Cl<sub>2</sub>.

|                     |           |                     |          |
|---------------------|-----------|---------------------|----------|
| Pb(1)-Cl(1)         | 3.172(7)  | O(1)-Cd(1)-O(2)#5   | 77.9(5)  |
| Pb(1)-O(1)          | 2.297(16) | O(1)#3-Cd(1)-O(2)#4 | 77.9(5)  |
| Pb(1)-O(3)#1        | 2.363(16) | O(1)#3-Cd(1)-O(2)#5 | 130.1(6) |
| Pb(1)-O(4)#2        | 2.302(16) | O(1)#3-Cd(1)-O(3)#3 | 89.4(6)  |
| Te(1)-O(2)          | 1.890(17) | O(1)#3-Cd(1)-O(3)   | 75.7(6)  |
| Te(1)-O(3)          | 1.872(16) | O(1)-Cd(1)-O(3)#3   | 75.7(6)  |
| Te(1)-O(4)          | 1.896(15) | O(1)-Cd(1)-O(3)     | 89.4(6)  |
| Te(2)-O(1)          | 1.909(14) | O(1)-Cd(1)-O(4)#5   | 104.5(5) |
| Te(2)-O(1)#3        | 1.909(14) | O(1)-Cd(1)-O(4)#4   | 158.1(6) |
| Te(2)-O(2)#3        | 2.138(19) | O(1)#3-Cd(1)-O(4)#5 | 158.1(6) |
| Te(2)-O(2)          | 2.138(19) | O(1)#3-Cd(1)-O(4)#4 | 104.5(5) |
| Cd(1)-Cd(1)#3       | 0.000(4)  | O(2)#5-Cd(1)-O(2)#4 | 149.5(8) |
| Cd(1)-O(1)#3        | 2.334(14) | O(2)#4-Cd(1)-O(3)#3 | 67.6(6)  |
| Cd(1)-O(1)          | 2.334(14) | O(2)#5-Cd(1)-O(3)#3 | 117.6(6) |
| Cd(1)-O(2)#4        | 2.536(19) | O(2)#5-Cd(1)-O(3)   | 67.6(6)  |
| Cd(1)-O(2)#5        | 2.536(19) | O(2)#4-Cd(1)-O(3)   | 117.6(6) |
| Cd(1)-O(3)#3        | 2.64(2)   | O(3)#3-Cd(1)-O(3)   | 162.1(7) |
| Cd(1)-O(3)          | 2.64(2)   | O(4)#4-Cd(1)-O(2)#4 | 65.0(5)  |
| Cd(1)-O(4)#4        | 2.350(15) | O(4)#5-Cd(1)-O(2)#5 | 65.0(5)  |
| Cd(1)-O(4)#5        | 2.350(15) | O(4)#4-Cd(1)-O(2)#5 | 92.6(5)  |
|                     |           | O(4)#5-Cd(1)-O(2)#4 | 92.6(5)  |
| O(1)-Pb(1)-Cl(1)    | 93.6(5)   | O(4)#4-Cd(1)-O(3)   | 68.7(5)  |
| O(1)-Pb(1)-O(3)#1   | 75.7(6)   | O(4)#5-Cd(1)-O(3)   | 125.9(5) |
| O(1)-Pb(1)-O(4)#2   | 95.3(6)   | O(4)#5-Cd(1)-O(3)#3 | 68.7(5)  |
| O(3)#1-Pb(1)-Cl(1)  | 77.7(5)   | O(4)#4-Cd(1)-O(3)#3 | 125.9(5) |
| O(4)#2-Pb(1)-Cl(1)  | 147.6(4)  | O(4)#4-Cd(1)-O(4)#5 | 88.8(8)  |
| O(4)#2-Pb(1)-O(3)#1 | 74.5(6)   | O(3)-Te(1)-O(2)     | 102.0(8) |
| O(2)-Te(1)-O(4)     | 88.0(7)   | O(3)-Te(1)-O(4)     | 98.5(8)  |
| O(1)#3-Te(2)-O(1)   | 87.5(9)   | O(1)#3-Cd(1)-O(1)   | 68.9(7)  |
| O(1)#3-Te(2)-O(2)   | 87.2(7)   | O(1)-Cd(1)-O(2)#4   | 130.1(6) |
| O(1)-Te(2)-O(2)#3   | 87.2(7)   | O(1)-Te(2)-O(2)     | 91.6(8)  |
| O(1)#3-Te(2)-O(2)#3 | 91.6(8)   | O(2)-Te(2)-O(2)#3   | 178.3(9) |

Symmetry transformations used to generate equivalent atoms:

#1 -x-1,-y-3/2,z+1/2    #2 -x-1,-y-2,z    #3 -x-1,-y-1,z

#4 x,y+1/2,z-1/2    #5 -x-1,-y-3/2,z-1/2

**Table S3.** Atomic coordinates ( $\times 10^4$ ) and equivalent isotropic displacement parameters ( $\text{\AA}^2 \times 10^3$ ) for  $\text{Cd}_{13}\text{Pb}_8\text{Te}_{14}\text{O}_{42}\text{Cl}_{14}$ .  $U_{\text{eq}}$  is defined as one third of the trace of the orthogonalized  $U_{ij}$  tensor.

| Atom  | x         | y        | z        | U(eq) | BVS  |
|-------|-----------|----------|----------|-------|------|
| Cd(1) | 13010(1)  | 4958(1)  | 5437(1)  | 12(1) | 1.95 |
| Cd(2) | 7958(1)   | 5074(1)  | 405(1)   | 13(1) | 1.93 |
| Cd(3) | -3726(1)  | 5002(1)  | 8776(1)  | 14(1) | 2.08 |
| Cd(4) | 15410(1)  | 4995(1)  | 2843(1)  | 13(1) | 1.96 |
| Cd(5) | 11275(1)  | 5013(1)  | 3677(1)  | 13(1) | 1.97 |
| Cd(6) | 10360(1)  | 5008(1)  | 7976(1)  | 14(1) | 1.92 |
| Cd(7) | 10000     | 10000    | 5000     | 22(1) | 1.89 |
| Pb(1) | 913(1)    | 1895(1)  | 10872(1) | 14(1) | 1.97 |
| Pb(2) | 8178(1)   | 1770(1)  | 3352(1)  | 16(1) | 2.21 |
| Pb(3) | 15782(1)  | 1655(1)  | 5819(1)  | 14(1) | 2.33 |
| Pb(4) | 3598(1)   | 1900(1)  | 8323(1)  | 16(1) | 1.99 |
| Te(1) | 11903(1)  | 2709(1)  | 6680(1)  | 10(1) | 3.84 |
| Te(2) | 6922(1)   | 2514(1)  | 1692(1)  | 11(1) | 4.12 |
| Te(3) | 14272(1)  | 2745(1)  | 4218(1)  | 11(1) | 3.92 |
| Te(4) | -427(1)   | 2438(1)  | 9194(1)  | 11(1) | 4.04 |
| Te(5) | 4748(1)   | 2291(1)  | 9988(1)  | 10(1) | 4.06 |
| Te(6) | 7454(1)   | 2290(1)  | 7343(1)  | 11(1) | 3.89 |
| Te(7) | 12107(1)  | 2302(1)  | 2582(1)  | 11(1) | 3.90 |
| O(1)  | 11842(9)  | 3379(9)  | 1820(4)  | 17(2) | 2.06 |
| O(2)  | 11103(9)  | 4250(9)  | 6176(4)  | 18(2) | 2.11 |
| O(3)  | 12388(9)  | 3677(9)  | 7446(3)  | 13(2) | 2.10 |
| O(4)  | 3060(9)   | 3355(9)  | 10411(4) | 16(2) | 2.19 |
| O(5)  | 7474(10)  | 3106(9)  | 2497(4)  | 20(2) | 2.35 |
| O(6)  | 13843(9)  | 3169(9)  | 6293(4)  | 17(2) | 2.28 |
| O(7)  | 5900(9)   | 3380(9)  | 7833(4)  | 15(2) | 2.05 |
| O(8)  | 4494(10)  | 3309(9)  | 9209(4)  | 22(2) | 2.18 |
| O(9)  | 15950(9)  | 3644(9)  | 3755(3)  | 13(2) | 2.18 |
| O(10) | 10344(9)  | 3157(9)  | 3021(4)  | 18(2) | 2.25 |
| O(11) | 8618(9)   | 3512(9)  | 1266(3)  | 13(2) | 2.18 |
| O(12) | -91(10)   | 3390(9)  | 9969(4)  | 16(2) | 2.19 |
| O(13) | 15114(9)  | 3294(9)  | 4990(3)  | 14(2) | 2.24 |
| O(14) | -1528(11) | 3931(11) | 8821(5)  | 38(3) | 2.13 |
| O(15) | 13326(9)  | 3530(9)  | 3054(4)  | 18(2) | 1.86 |
| O(16) | 1381(9)   | 3242(9)  | 8787(4)  | 19(2) | 2.04 |
| O(17) | 9164(9)   | 3522(9)  | 7320(4)  | 18(2) | 1.91 |
| O(18) | 6952(9)   | 3119(9)  | 6555(3)  | 17(2) | 1.93 |
| O(19) | 12789(10) | 4240(10) | 4396(4)  | 22(2) | 2.16 |

---

|       |          |          |          |       |      |
|-------|----------|----------|----------|-------|------|
| O(20) | 5486(12) | 4012(12) | 1747(5)  | 36(2) | 2.26 |
| O(21) | 6214(12) | 3385(11) | 10326(7) | 56(4) | 2.00 |
| CI(1) | 14627(3) | -22(4)   | 7054(1)  | 23(1) | 0.81 |
| CI(2) | 9448(3)  | 29(3)    | 2121(1)  | 21(1) | 0.70 |
| CI(3) | 2038(3)  | 106(3)   | 9581(1)  | 21(1) | 0.71 |
| CI(4) | 8887(3)  | 9970(4)  | 6190(1)  | 25(1) | 0.88 |
| CI(5) | 6283(3)  | -59(4)   | 8737(1)  | 29(1) | 0.65 |
| CI(6) | 7311(4)  | 9434(4)  | 4622(2)  | 28(1) | 0.92 |
| CI(7) | 10925(4) | 7066(4)  | 5156(2)  | 37(1) | 0.62 |

---

**Table S4.** Bond lengths [Å] and angles [°] for Cd<sub>13</sub>Pb<sub>8</sub>Te<sub>14</sub>O<sub>42</sub>Cl<sub>14</sub>.

|               |            |                |           |
|---------------|------------|----------------|-----------|
| Pb(1)-Cl(3)   | 3.199(3)   | Cd(3)-O(1)#5   | 2.464(8)  |
| Pb(1)-O(1)#1  | 2.577(8)   | Cd(3)-O(4)#9   | 2.364(8)  |
| Pb(1)-O(4)    | 2.433(8)   | Cd(3)-O(7)#2   | 2.492(7)  |
| Pb(1)-O(11)#1 | 2.541(8)   | Cd(3)-O(8)#2   | 2.318(9)  |
| Pb(1)-O(12)   | 2.516(8)   | Cd(3)-O(14)    | 2.148(9)  |
| Pb(2)-Cl(2)   | 3.111(3)   | Cd(3)-O(20)#10 | 2.142(9)  |
| Pb(2)-O(5)    | 2.265(8)   | Cd(4)-O(3)#4   | 2.316(8)  |
| Pb(2)-O(9)#2  | 2.640(8)   | Cd(4)-O(5)#3   | 2.522(8)  |
| Pb(2)-O(10)   | 2.336(8)   | Cd(4)-O(6)#4   | 2.573(8)  |
| Pb(3)-Cl(1)   | 3.068(3)   | Cd(4)-O(7)#6   | 2.375(8)  |
| Pb(3)-O(6)    | 2.313(8)   | Cd(4)-O(9)     | 2.324(7)  |
| Pb(3)-O(13)   | 2.370(8)   | Cd(4)-O(15)    | 2.277(8)  |
| Pb(3)-O(18)#3 | 2.333(7)   | Cd(4)-O(20)#3  | 2.435(9)  |
| Pb(4)-Cl(5)   | 3.099(3)   | Cd(5)-O(2)#6   | 2.171(8)  |
| Pb(4)-O(3)#2  | 2.695(8)   | Cd(5)-O(10)    | 2.359(8)  |
| Pb(4)-O(7)    | 2.565(8)   | Cd(5)-O(15)    | 2.491(8)  |
| Pb(4)-O(8)    | 2.429(9)   | Cd(5)-O(17)#6  | 2.505(8)  |
| Pb(4)-O(16)   | 2.399(8)   | Cd(5)-O(18)#6  | 2.326(8)  |
| Te(1)-Cd(1)   | 3.3555(10) | Cd(5)-O(19)    | 2.185(8)  |
| Te(1)-O(2)    | 1.897(8)   | Cd(6)-O(1)#6   | 2.405(8)  |
| Te(1)-O(3)    | 1.897(7)   | Cd(6)-O(3)     | 2.322(8)  |
| Te(1)-O(6)    | 1.864(8)   | Cd(6)-O(11)#6  | 2.311(7)  |
| Te(2)-O(5)    | 1.859(8)   | Cd(6)-O(14)#3  | 2.502(11) |
| Te(2)-O(11)   | 1.896(8)   | Cd(6)-O(16)#3  | 2.522(8)  |
| Te(2)-O(20)   | 1.828(9)   | Cd(6)-O(17)    | 2.245(8)  |
| Te(3)-Cd(1)   | 3.3244(10) | Cd(7)-Cl(4)#11 | 2.570(3)  |
| Te(3)-Cd(1)#4 | 3.3029(10) | Cd(7)-Cl(4)    | 2.570(3)  |
| Te(3)-O(9)    | 1.875(8)   | Cd(7)-Cl(6)#11 | 2.603(3)  |
| Te(3)-O(13)   | 1.889(7)   | Cd(7)-Cl(6)    | 2.603(3)  |
| Te(3)-O(19)   | 1.872(8)   | Cd(7)-Cl(7)    | 2.781(3)  |
| Te(4)-Cd(2)#5 | 3.2953(10) | Cd(7)-Cl(7)#11 | 2.781(3)  |
| Te(4)-O(12)   | 1.872(8)   | Te(7)-O(10)    | 1.876(8)  |
| Te(4)-O(14)   | 1.850(9)   | Te(7)-O(15)    | 1.882(8)  |
| Te(4)-O(16)   | 1.879(8)   | Cd(1)-Cl(7)    | 2.713(3)  |
| Te(5)-O(4)    | 1.898(7)   | Cd(1)-O(2)     | 2.260(8)  |
| Te(5)-O(8)    | 1.884(8)   | Cd(1)-O(6)     | 2.540(8)  |
| Te(5)-O(21)   | 1.819(10)  | Cd(1)-O(9)#4   | 2.353(7)  |
| Te(6)-Cd(5)#6 | 3.3544(10) | Cd(1)-O(13)#4  | 2.402(8)  |
| Te(6)-O(7)    | 1.889(8)   | Cd(1)-O(13)    | 2.474(8)  |
| Te(6)-O(17)   | 1.874(8)   | Cd(1)-O(19)    | 2.279(8)  |
| Te(6)-O(18)   | 1.879(7)   | Cd(2)-O(4)#5   | 2.423(8)  |
| Te(7)-O(1)    | 1.881(8)   | Cd(2)-O(8)#5   | 2.641(9)  |



|                       |            |                       |          |
|-----------------------|------------|-----------------------|----------|
| Cd(2)-O(11)           | 2.375(7)   | O(7)#6-Cd(4)-O(6)#4   | 100.4(3) |
| Cd(2)-O(12)#7         | 2.387(8)   | O(7)#6-Cd(4)-O(20)#3  | 69.4(3)  |
| Cd(2)-O(12)#5         | 2.411(8)   | O(9)-Cd(4)-O(5)#3     | 72.2(3)  |
| Cd(2)-O(16)#5         | 2.377(9)   | O(9)-Cd(4)-O(6)#4     | 71.9(3)  |
| Cd(2)-O(21)#8         | 2.188(10)  | O(9)-Cd(4)-O(7)#6     | 159.7(3) |
| O(16)#5-Cd(2)-O(4)#5  | 104.3(3)   | O(9)-Cd(4)-O(20)#3    | 125.3(3) |
| O(16)#5-Cd(2)-O(8)#5  | 71.3(3)    | O(15)-Cd(4)-O(3)#4    | 174.5(3) |
| O(16)#5-Cd(2)-O(12)#5 | 67.7(3)    | O(15)-Cd(4)-O(5)#3    | 101.7(3) |
| O(16)#5-Cd(2)-O(12)#7 | 117.4(3)   | O(15)-Cd(4)-O(6)#4    | 119.9(3) |
| O(21)#8-Cd(2)-O(4)#5  | 93.1(4)    | O(15)-Cd(4)-O(7)#6    | 93.0(3)  |
| O(21)#8-Cd(2)-O(8)#5  | 81.5(4)    | O(15)-Cd(4)-O(9)      | 75.8(3)  |
| O(21)#8-Cd(2)-O(11)   | 81.9(4)    | O(15)-Cd(4)-O(20)#3   | 85.3(3)  |
| O(21)#8-Cd(2)-O(12)#7 | 90.5(4)    | O(20)#3-Cd(4)-O(5)#3  | 62.1(3)  |
| O(21)#8-Cd(2)-O(12)#5 | 156.0(4)   | O(20)#3-Cd(4)-O(6)#4  | 153.9(3) |
| O(21)#8-Cd(2)-O(16)#5 | 136.3(4)   | O(2)#6-Cd(5)-O(10)    | 85.1(3)  |
| O(1)#5-Cd(3)-O(7)#2   | 95.2(3)    | O(2)#6-Cd(5)-O(15)    | 149.7(3) |
| O(4)#9-Cd(3)-O(1)#5   | 77.4(3)    | O(2)#6-Cd(5)-O(17)#6  | 75.3(3)  |
| O(4)#9-Cd(3)-O(7)#2   | 172.2(2)   | O(2)#6-Cd(5)-O(18)#6  | 115.3(3) |
| O(8)#2-Cd(3)-O(1)#5   | 172.4(3)   | O(2)#6-Cd(5)-O(19)    | 128.8(3) |
| O(8)#2-Cd(3)-O(4)#9   | 110.2(3)   | O(10)-Cd(5)-O(15)     | 65.9(3)  |
| O(8)#2-Cd(3)-O(7)#2   | 77.2(3)    | O(10)-Cd(5)-O(17)#6   | 79.2(3)  |
| O(14)-Cd(3)-O(1)#5    | 73.9(3)    | O(15)-Cd(5)-O(17)#6   | 90.2(3)  |
| O(11)-Cd(2)-O(8)#5    | 109.6(3)   | O(18)#6-Cd(5)-O(10)   | 131.6(3) |
| O(11)-Cd(2)-O(12)#5   | 110.6(3)   | O(18)#6-Cd(5)-O(15)   | 81.0(3)  |
| O(11)-Cd(2)-O(12)#7   | 72.7(3)    | O(18)#6-Cd(5)-O(17)#6 | 66.1(3)  |
| O(11)-Cd(2)-O(16)#5   | 76.1(3)    | O(19)-Cd(5)-O(10)     | 115.7(3) |
| O(12)#7-Cd(2)-O(4)#5  | 113.1(3)   | O(19)-Cd(5)-O(15)     | 74.9(3)  |
| O(12)#5-Cd(2)-O(4)#5  | 76.1(3)    | O(19)-Cd(5)-O(17)#6   | 150.5(3) |
| O(12)#7-Cd(2)-O(8)#5  | 171.1(3)   | O(19)-Cd(5)-O(18)#6   | 86.2(3)  |
| O(12)#5-Cd(2)-O(8)#5  | 111.5(3)   | O(1)#6-Cd(6)-O(14)#3  | 69.1(3)  |
| O(12)#7-Cd(2)-O(12)#5 | 74.8(3)    | O(1)#6-Cd(6)-O(16)#3  | 125.4(3) |
| O(1)#1-Pb(1)-Cl(3)    | 143.81(18) | O(3)-Cd(6)-O(1)#6     | 161.8(3) |
| O(4)-Pb(1)-Cl(3)      | 77.22(18)  | O(3)-Cd(6)-O(14)#3    | 124.0(3) |
| O(4)-Pb(1)-O(1)#1     | 74.0(2)    | O(3)-Cd(6)-O(16)#3    | 72.4(3)  |
| O(4)-Pb(1)-O(11)#1    | 112.1(3)   | O(11)#6-Cd(6)-O(1)#6  | 83.4(3)  |
| O(4)-Pb(1)-O(12)      | 74.0(3)    | O(11)#6-Cd(6)-O(3)    | 107.0(3) |
| O(11)#1-Pb(1)-Cl(3)   | 136.64(17) | O(11)#6-Cd(6)-O(14)#3 | 91.6(3)  |
| O(11)#1-Pb(1)-O(1)#1  | 75.7(2)    | O(11)#6-Cd(6)-O(16)#3 | 74.4(3)  |
| O(12)-Pb(1)-Cl(3)     | 75.24(18)  | O(14)#3-Cd(6)-O(16)#3 | 62.5(3)  |
| O(12)-Pb(1)-O(1)#1    | 116.3(3)   | O(17)-Cd(6)-O(1)#6    | 93.2(3)  |
| O(12)-Pb(1)-O(11)#1   | 67.9(2)    | O(17)-Cd(6)-O(3)      | 77.5(3)  |
| O(5)-Pb(2)-Cl(2)      | 74.0(2)    | O(17)-Cd(6)-O(11)#6   | 173.9(3) |
| O(5)-Pb(2)-O(9)#2     | 70.8(3)    | O(17)-Cd(6)-O(14)#3   | 82.5(3)  |
| O(5)-Pb(2)-O(10)      | 75.7(3)    | O(17)-Cd(6)-O(16)#3   | 103.7(3) |

|                     |            |                         |            |
|---------------------|------------|-------------------------|------------|
| O(9)#2-Pb(2)-Cl(2)  | 140.79(16) | Cl(4)#11-Cd(7)-Cl(4)    | 180        |
| O(10)-Pb(2)-Cl(2)   | 79.1(2)    | Cl(4)-Cd(7)-Cl(6)       | 90.58(9)   |
| O(10)-Pb(2)-O(9)#2  | 107.8(3)   | Cl(4)-Cd(7)-Cl(6)#11    | 89.42(9)   |
| O(6)-Pb(3)-Cl(1)    | 76.0(2)    | Cl(4)#11-Cd(7)-Cl(6)#11 | 90.58(9)   |
| O(6)-Pb(3)-O(13)    | 74.4(3)    | Cl(4)#11-Cd(7)-Cl(6)    | 89.42(9)   |
| O(6)-Pb(3)-O(18)#3  | 74.7(3)    | Cl(4)#11-Cd(7)-Cl(7)#11 | 88.03(11)  |
| O(13)-Pb(3)-Cl(1)   | 145.7(2)   | Cl(4)-Cd(7)-Cl(7)       | 88.03(11)  |
| O(18)#3-Pb(3)-Cl(1) | 82.59(19)  | Cl(4)-Cd(7)-Cl(7)#11    | 91.97(11)  |
| O(18)#3-Pb(3)-O(13) | 105.6(3)   | Cl(4)#11-Cd(7)-Cl(7)    | 91.97(11)  |
| O(3)#2-Pb(4)-Cl(5)  | 150.09(17) | Cl(6)#11-Cd(7)-Cl(6)    | 180.00(14) |
| O(7)-Pb(4)-Cl(5)    | 79.51(18)  | Cl(6)-Cd(7)-Cl(7)       | 96.67(11)  |
| O(7)-Pb(4)-O(3)#2   | 76.3(2)    | Cl(6)#11-Cd(7)-Cl(7)    | 83.33(11)  |
| O(8)-Pb(4)-Cl(5)    | 77.5(2)    | Cl(6)#11-Cd(7)-Cl(7)#11 | 96.67(11)  |
| O(8)-Pb(4)-O(3)#2   | 111.8(3)   | Cl(6)-Cd(7)-Cl(7)#11    | 83.33(11)  |
| O(8)-Pb(4)-O(7)     | 73.9(3)    | Cl(7)-Cd(7)-Cl(7)#11    | 180.00(15) |
| O(16)-Pb(4)-Cl(5)   | 140.3(2)   | O(2)-Cd(1)-O(13)#4      | 151.9(3)   |
| O(16)-Pb(4)-O(3)#2  | 68.2(3)    | O(2)-Cd(1)-O(19)        | 116.0(3)   |
| O(16)-Pb(4)-O(7)    | 118.4(3)   | O(6)-Cd(1)-Cl(7)        | 145.44(19) |
| O(16)-Pb(4)-O(8)    | 74.9(3)    | O(9)#4-Cd(1)-Cl(7)      | 95.0(2)    |
| O(3)-Te(1)-O(2)     | 104.0(3)   | O(9)#4-Cd(1)-O(6)       | 72.1(3)    |
| O(6)-Te(1)-O(2)     | 87.7(4)    | O(9)#4-Cd(1)-O(13)      | 105.6(3)   |
| O(6)-Te(1)-O(3)     | 89.3(3)    | O(9)#4-Cd(1)-O(13)#4    | 66.8(3)    |
| O(5)-Te(2)-O(11)    | 91.2(4)    | O(13)-Cd(1)-Cl(7)       | 145.37(19) |
| O(20)-Te(2)-O(5)    | 87.8(4)    | O(13)#4-Cd(1)-Cl(7)     | 85.0(2)    |
| O(20)-Te(2)-O(11)   | 100.4(4)   | O(13)-Cd(1)-O(6)        | 68.7(2)    |
| O(9)-Te(3)-O(13)    | 88.1(3)    | O(13)#4-Cd(1)-O(6)      | 116.5(3)   |
| O(19)-Te(3)-O(9)    | 106.5(4)   | O(13)#4-Cd(1)-O(13)     | 78.3(3)    |
| O(19)-Te(3)-O(13)   | 87.5(3)    | O(19)-Cd(1)-Cl(7)       | 83.1(2)    |
| O(12)-Te(4)-O(16)   | 90.6(4)    | O(19)-Cd(1)-O(6)        | 122.2(3)   |
| O(14)-Te(4)-O(12)   | 98.7(4)    | O(19)-Cd(1)-O(9)#4      | 154.2(3)   |
| O(14)-Te(4)-O(16)   | 88.6(4)    | O(19)-Cd(1)-O(13)#4     | 87.4(3)    |
| O(8)-Te(5)-O(4)     | 90.6(4)    | O(19)-Cd(1)-O(13)       | 66.2(3)    |
| O(21)-Te(5)-O(4)    | 95.4(5)    | O(4)#5-Cd(2)-O(8)#5     | 63.9(2)    |
| O(21)-Te(5)-O(8)    | 101.7(5)   | O(10)-Te(7)-O(15)       | 89.3(3)    |
| O(17)-Te(6)-O(7)    | 103.8(3)   | O(2)-Cd(1)-Cl(7)        | 82.9(2)    |
| O(17)-Te(6)-O(18)   | 89.4(3)    | O(2)-Cd(1)-O(6)         | 65.4(3)    |
| O(18)-Te(6)-O(7)    | 93.1(3)    | O(2)-Cd(1)-O(9)#4       | 89.1(3)    |
| O(1)-Te(7)-O(15)    | 104.3(3)   | O(2)-Cd(1)-O(13)        | 124.1(3)   |
| O(10)-Te(7)-O(1)    | 92.6(3)    |                         |            |

Symmetry transformations used to generate equivalent atoms:

#1  $x-1,y,z+1$     #2  $x-1,y,z$     #3  $x+1,y,z$     #4  $-x+3,-y+1,-z+1$     #11  $-x+2,-y+2,-z+1$   
#5  $-x+1,-y+1,-z+1$     #6  $-x+2,-y+1,-z+1$     #7  $x+1,y,z-1$     #10  $-x,-y+1,-z+1$   
#8  $x,y,z-1$     #9  $-x,-y+1,-z+2$

**Table S5.** Selected Mulliken atomic populations.

| Compound                                                         | Charge Q (in   e  ) |            |            |             |             |
|------------------------------------------------------------------|---------------------|------------|------------|-------------|-------------|
| CdPb <sub>2</sub> Te <sub>3</sub> O <sub>8</sub> Cl <sub>2</sub> | Atom<br>population  | Cd<br>0.98 | Pb<br>1.06 | Te1<br>1.82 | Te2<br>1.98 |

**Table S6.** Selected bond distances and Mulliken overlap populations for characteristic atomic pairs.

| Compound-FBB                                                     | Value Atomic/<br>pair | bond distances/ <i>d</i><br>(Å) | overlap<br>populations<br>/(  e  ) |
|------------------------------------------------------------------|-----------------------|---------------------------------|------------------------------------|
| CdPb <sub>2</sub> Te <sub>3</sub> O <sub>8</sub> Cl <sub>2</sub> | Te1-O                 | 1.872-1.896                     | 0.39-0.47                          |
|                                                                  | Te2-O                 | 1.908-2.141                     | 0.23-0.49                          |
|                                                                  | Pb-O                  | 2.299-2.363                     | 0.08-0.11                          |
|                                                                  | Pb-Cl                 | 3.172-3.431                     | 0.00-0.07                          |
|                                                                  | Cd-O                  | 2.334-2.642                     | 0.16-0.18                          |

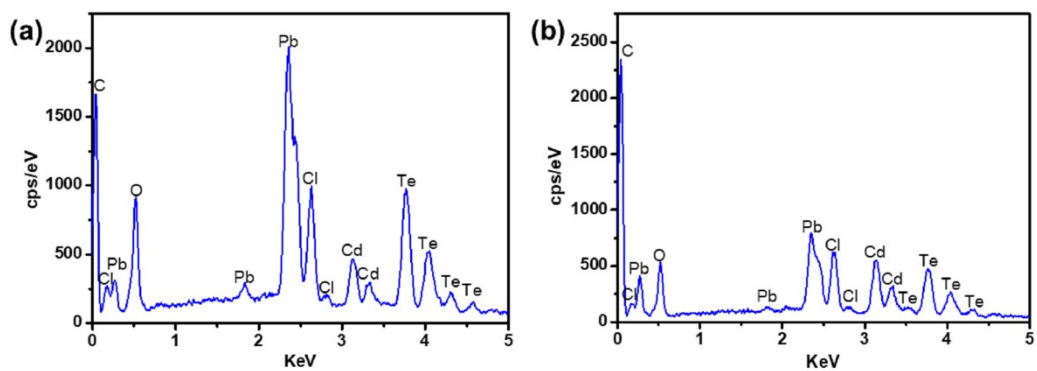

**Figure S1.** The EDS spectra of  $\text{CdPb}_2\text{Te}_3\text{O}_8\text{Cl}_2$  (a) and  $\text{Cd}_{13}\text{Pb}_8\text{Te}_{14}\text{O}_{42}\text{Cl}_{14}$  (b).

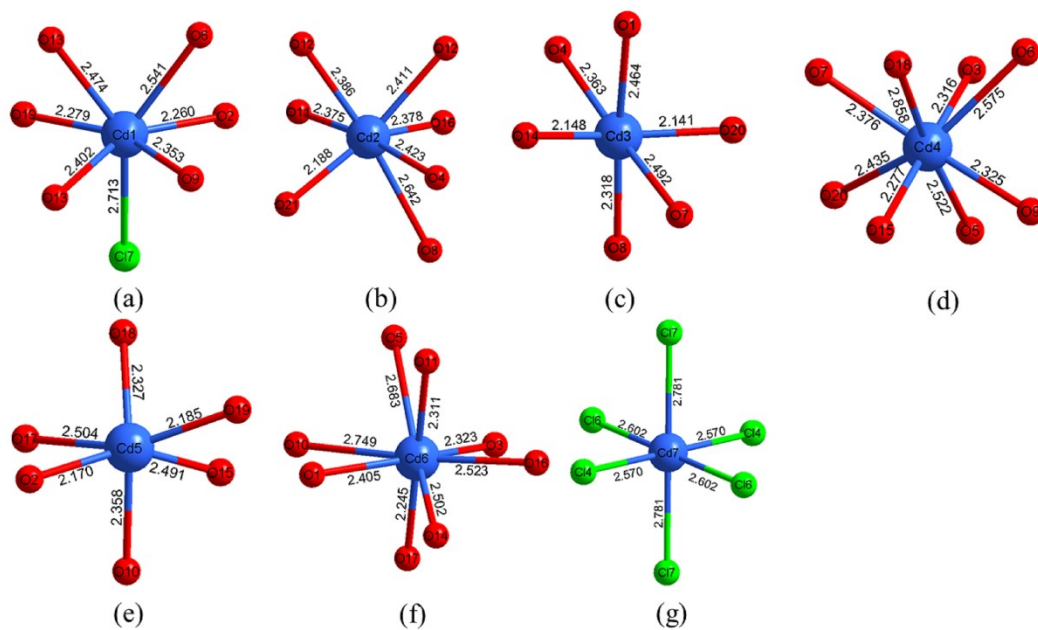

**Figure S2.** (a-g) Coordination of Cd1-Cd7 atoms in  $\text{Cd}_{13}\text{Pb}_8\text{Te}_{14}\text{O}_{42}\text{Cl}_{14}$ .

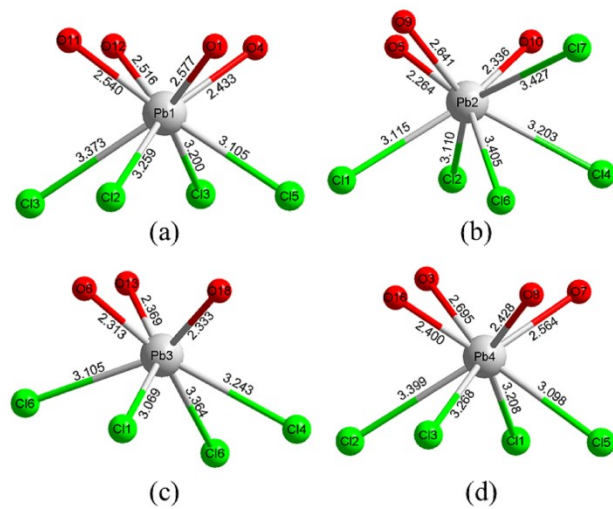

**Figure S3.** (a-d) Coordination of Pb1-Pb4 atoms in  $\text{Cd}_{13}\text{Pb}_8\text{Te}_{14}\text{O}_{42}\text{Cl}_{14}$ .

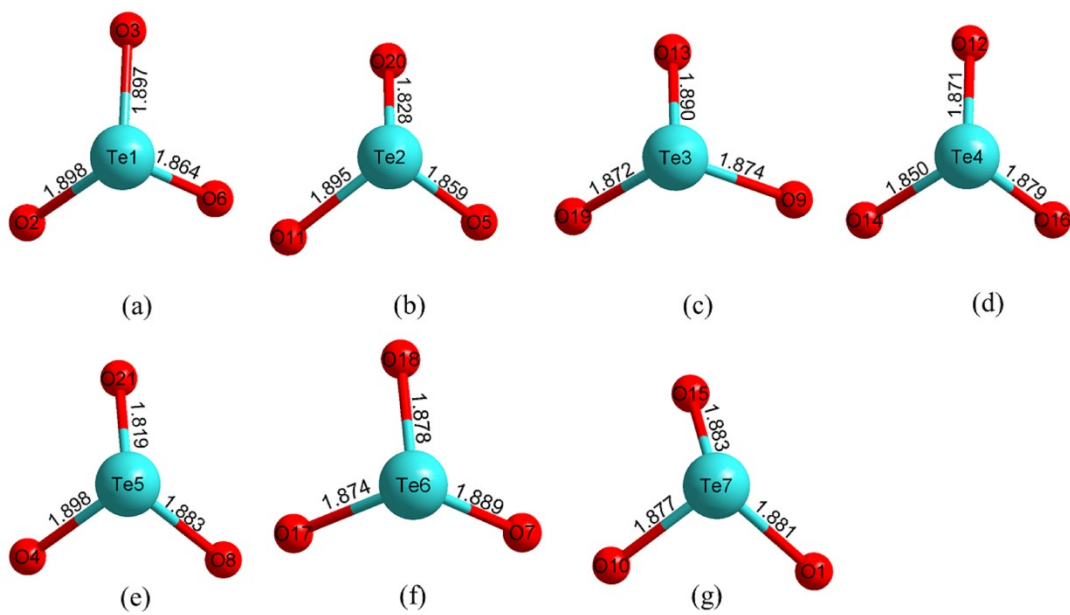

**Figure S4.** (a-g) Coordination of Te1-Te7 atoms in  $\text{Cd}_{13}\text{Pb}_8\text{Te}_{14}\text{O}_{42}\text{Cl}_{14}$ .

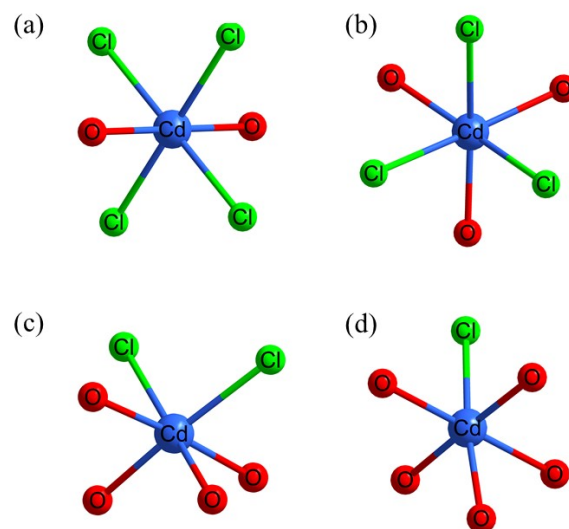

**Figure S5.** (a) The structure of  $[\text{CdO}_2\text{Cl}_4]$  in  $\text{C}_3\text{H}_9\text{Cd}_{1.5}\text{Cl}_3\text{O}_4\text{P}^1$ ; (b) The structure of  $[\text{CdO}_3\text{Cl}_3]$  in  $\text{CdOHCl}^2$ ; (c) The structure of  $[\text{CdO}_4\text{Cl}_2]$  in  $\text{Cd}(\text{IO}_3)\text{Cl}^3$ ; (d) The structure of  $[\text{CdO}_5\text{Cl}_1]$  in  $\text{Cd}_5(\text{BO}_3)_3\text{Cl}^4$ .



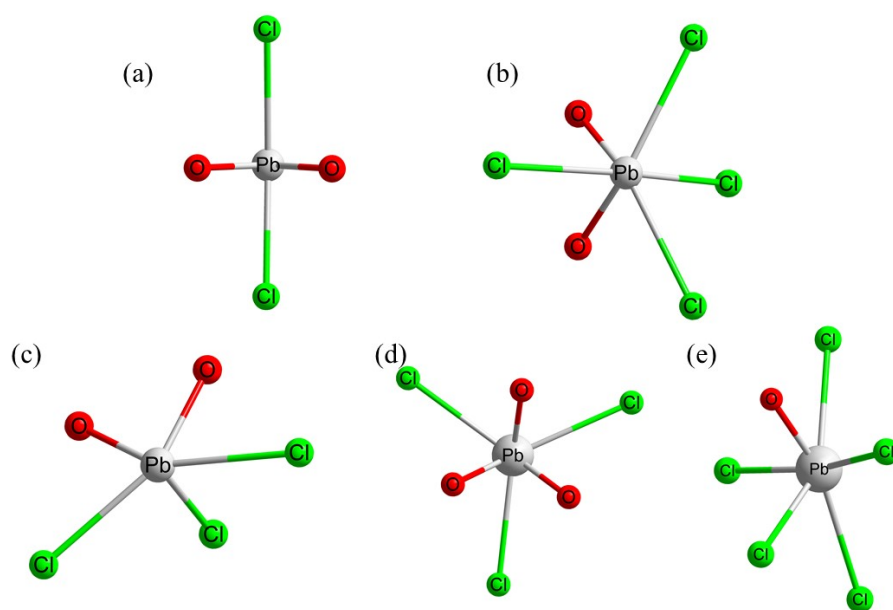

**Figure S6.** The structure of  $[\text{PbO}_2\text{Cl}_4]$  (a) and  $[\text{PbO}_2\text{Cl}_2]$  (b) in  $\text{Pb}_3\text{O}_2\text{Cl}_2^5$ ; (c) The structure of  $[\text{PbO}_2\text{Cl}_3]$  in  $\text{Pb}_{17}\text{O}_8\text{Cl}_{18}^6$ ; (d) The structure of  $[\text{PbO}_3\text{Cl}_3]$  in  $\text{Ba}_{27}\text{Pb}_8\text{O}_8\text{Cl}_{54}^7$  and  $\text{RbPb}_8\text{O}_4\text{Cl}_9^8$ ; (e) The structure of  $[\text{PbOC15}]$  in  $\text{RbPb}_8\text{O}_4\text{Cl}_9$ .

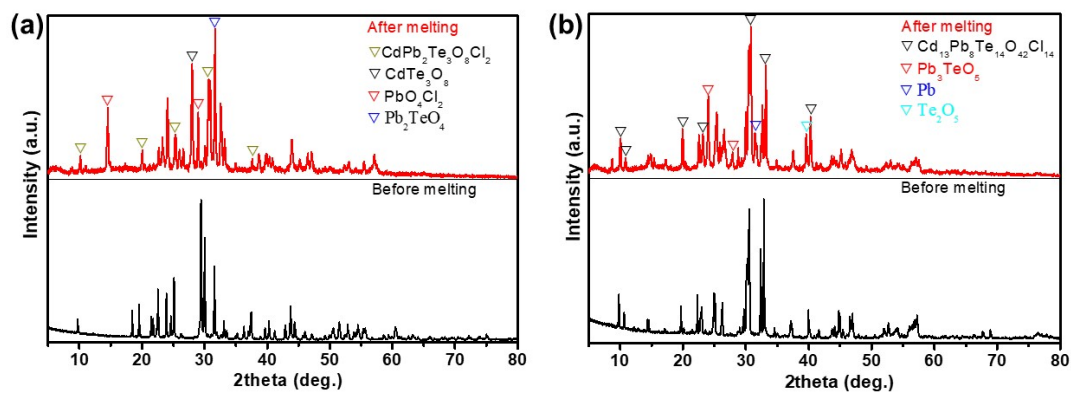

**Figure S7.** XRD patterns of  $\text{CdPb}_2\text{Te}_3\text{O}_8\text{Cl}_2$  (a) and  $\text{Cd}_{13}\text{Pb}_8\text{Te}_{14}\text{O}_{42}\text{Cl}_{14}$  (b) before and after heating at 550 °C ( $\text{CdPb}_2\text{Te}_3\text{O}_8\text{Cl}_2$ ) and 650 °C ( $\text{Cd}_{13}\text{Pb}_8\text{Te}_{14}\text{O}_{42}\text{Cl}_{14}$ ).

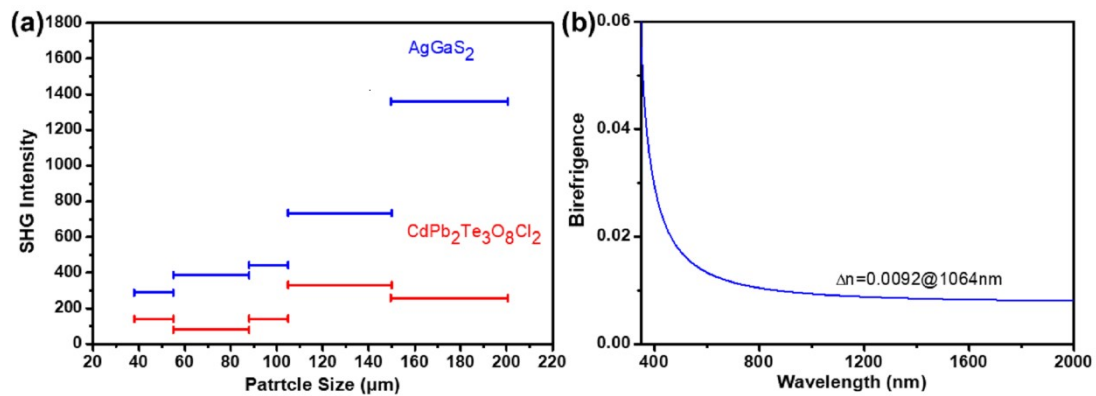

**Figure S8.** (a) SHG intensities of CdPb<sub>2</sub>Te<sub>3</sub>O<sub>8</sub>Cl<sub>2</sub> and AgGaS<sub>2</sub> as the references at 2.09 μm radiation. (b) Calculated birefringence ( $\Delta n$ ) of CdPb<sub>2</sub>Te<sub>3</sub>O<sub>8</sub>Cl<sub>2</sub>.

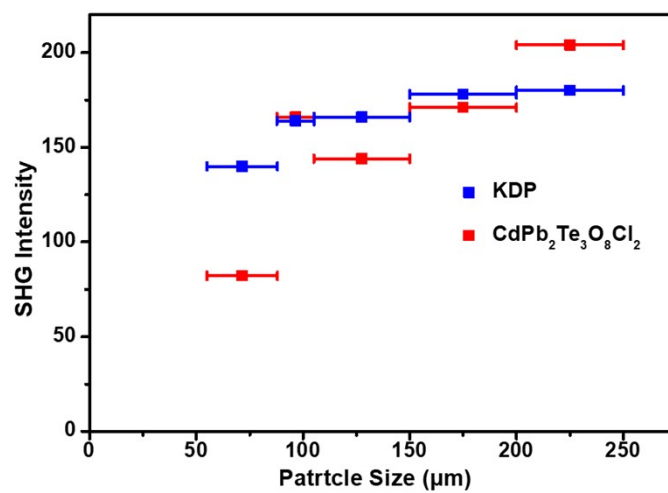

**Figure S9.** SHG intensities of CdPb<sub>2</sub>Te<sub>3</sub>O<sub>8</sub>Cl<sub>2</sub> and KDP as the references at 1064 nm radiation.

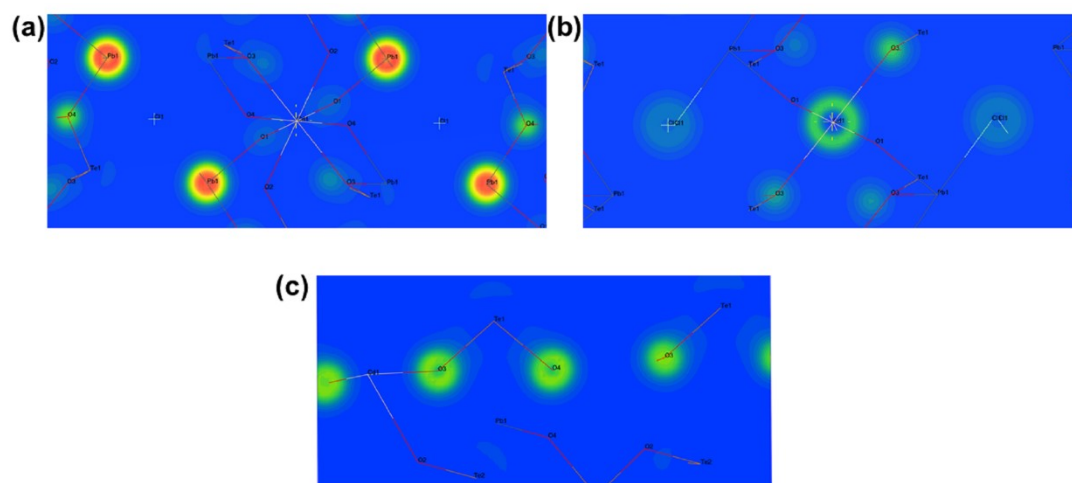

**Figure S10.** The electron density maps of Cd<sup>2+</sup>, Pb<sup>2+</sup> and Te<sup>4+</sup>.

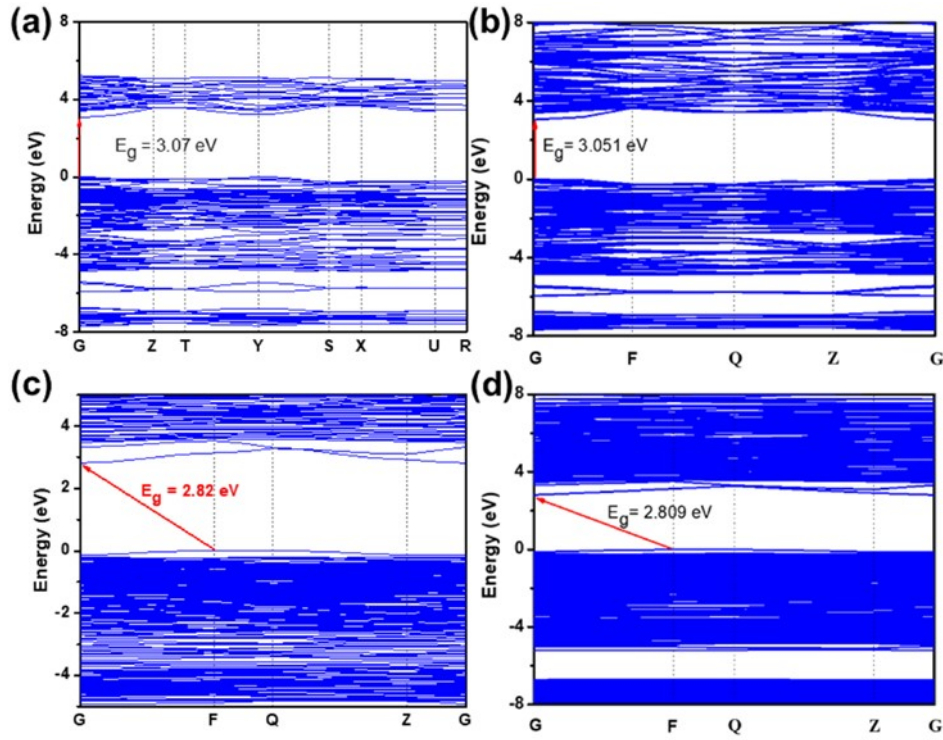

**Figure S11. Calculated band structures of  $\text{CdPb}_2\text{Te}_3\text{O}_8\text{Cl}_2$  and  $\text{Cd}_{13}\text{Pb}_8\text{Te}_{14}\text{O}_{42}\text{Cl}_{14}$  under different accuracy.** Band structures of  $\text{CdPb}_2\text{Te}_3\text{O}_8\text{Cl}_2$  under different accuracy: energy cutoff was set at 910 eV, a spacing of  $0.04 \text{ \AA}^{-1}$  (a) and energy cutoff was set at 700 eV, a spacing of  $0.035 \text{ \AA}^{-1}$  (b); Band structures of  $\text{Cd}_{13}\text{Pb}_8\text{Te}_{14}\text{O}_{42}\text{Cl}_{14}$  under different accuracy: energy cutoff was set at 910 eV, a spacing of  $0.04 \text{ \AA}^{-1}$  (c); energy cutoff was set at 700 eV, a spacing of  $0.035 \text{ \AA}^{-1}$  (d).

## References

1. A. V. Anyushin, D. A. Mainichev, N. K. Moroz, P. A. Abramov, D. Y. Naumov, M. N. Sokolov, V. P. Fedin, Cd<sup>2+</sup> Complexation with P(CH<sub>2</sub>OH)<sub>3</sub>, OP(CH<sub>2</sub>OH)<sub>3</sub>, and (HOCH<sub>2</sub>)<sub>2</sub>PO<sub>2</sub><sup>-</sup>: coordination in solution and coordination polymers, *Inorg. Chem.*, 2012, **51**, 9995-10003.
2. Y. Cudenneq, A. Riou, Y. G erault and A. Lecerf, Synthesis and crystal structures of Cd(OH)Cl and Cu(OH)Cl and relationship to brucite type, *J. Solid State Chem.*, 2000, **151**, 308-312.
3. B.-P. Yang and J.-G. Mao, Synthesis, crystal structure and optical properties of two new layered cadmium iodates: Cd(IO<sub>3</sub>)X (X=Cl, OH), *J. Solid State Chem.*, 2014, **219**, 185-190.
4. Y. X. Song, M. Luo, C. S. Lin, N. Ye, G. Y. Yan and Z. S. Lin, Experimental and ab initio studies of Cd<sub>5</sub>(BO<sub>3</sub>)<sub>3</sub>Cl: the first cadmium borate chlorine NLO material with isolated BO<sub>3</sub> groups, *Dalton Trans.*, 2017, **46**, 15228-15234.
5. O. I. Siidra, S. V. Krivovichev, T. Armbruster and W. Depmeier, Crystal chemistry of the mendipite-type system Pb<sub>3</sub>O<sub>2</sub>Cl<sub>2</sub>—Pb<sub>3</sub>O<sub>2</sub>Br<sub>2</sub>, *Z. Kristallogr.*, 2008, **223**, 204-211.
6. H. Zhang, S. L. Pan, X. Y. Dong, Z. H. Yang, X. L. Hou, Z. Wang, K. B. Chang and K. R. Poeppelmeier, Pb<sub>17</sub>O<sub>8</sub>Cl<sub>18</sub>: a promising IR nonlinear optical material with large laser damage threshold synthesized in an open system, *J. Am. Chem. Soc.*, 2015, **137**, 8360-8363.
7. Z. Li, X. X. Jiang, W. H. Xing, Z. S. Lin, J. Y. Yao and Y. C. Wu, Alkali-earth metal lead(ii) oxyhalide Ba<sub>27</sub>Pb<sub>8</sub>O<sub>8</sub>Cl<sub>54</sub> exhibiting interesting [Pb<sub>4</sub>Ba<sub>4</sub>O<sub>4</sub>]<sup>8+</sup> species, *New J. Chem.*, 2020, **44**, 1699-1702.
8. Z. X. Fan, C. Bai, H. S. Shi, M. Zhang, B. Zhang, J. Zhang and J. J. Li, RbPb<sub>8</sub>O<sub>4</sub>Cl<sub>9</sub>: the first alkali metal lead oxyhalide with distorted [PbO<sub>3</sub>Cl<sub>3</sub>] and [PbOCl<sub>5</sub>] mixed-anion groups, *Dalton Trans.*, 2021, **50**, 14038-14043.
